# Supplementary material for: Anisotropic Scattering in Radio-Echo Sounding: Insights from Northeast Greenland
Source: Copernicus journal article supplement (doi:10.5194/egusphere-2024-2276), 2024-09-06
Supplement: Supplementary file 1 [file egusphere-2024-2276-supplement.pdf]

# Supplementary Information of "Anisotropic Scattering in Radio-Echo Sounding: Insights from Northeast Greenland"

Tamara Annina Gerber<sup>1</sup>, David A. Lilien<sup>2,3</sup>, Niels F. Nymand<sup>1</sup>, Daniel Steinhage<sup>4</sup>, Olaf Eisen<sup>4,5</sup>, and Dorte Dahl-Jensen<sup>1,2</sup>

<sup>1</sup>Section for the Physics of Ice, Climate and Earth, Niels Bohr Institute, University of Copenhagen, Copenhagen, Denmark.

<sup>2</sup>Centre for Earth Observation Science, University of Manitoba, Winnipeg, MB, Canada.

<sup>3</sup>Department of Earth and Atmospheric Sciences, Indiana University, Bloomington, IN, USA

<sup>4</sup>Alfred Wegener Institute Helmholtz Centre for Polar and Marine Research, Bremerhaven, Germany

<sup>5</sup>Department of Geosciences, University of Bremen, Bremen, Germany.

# Supplementary Figures

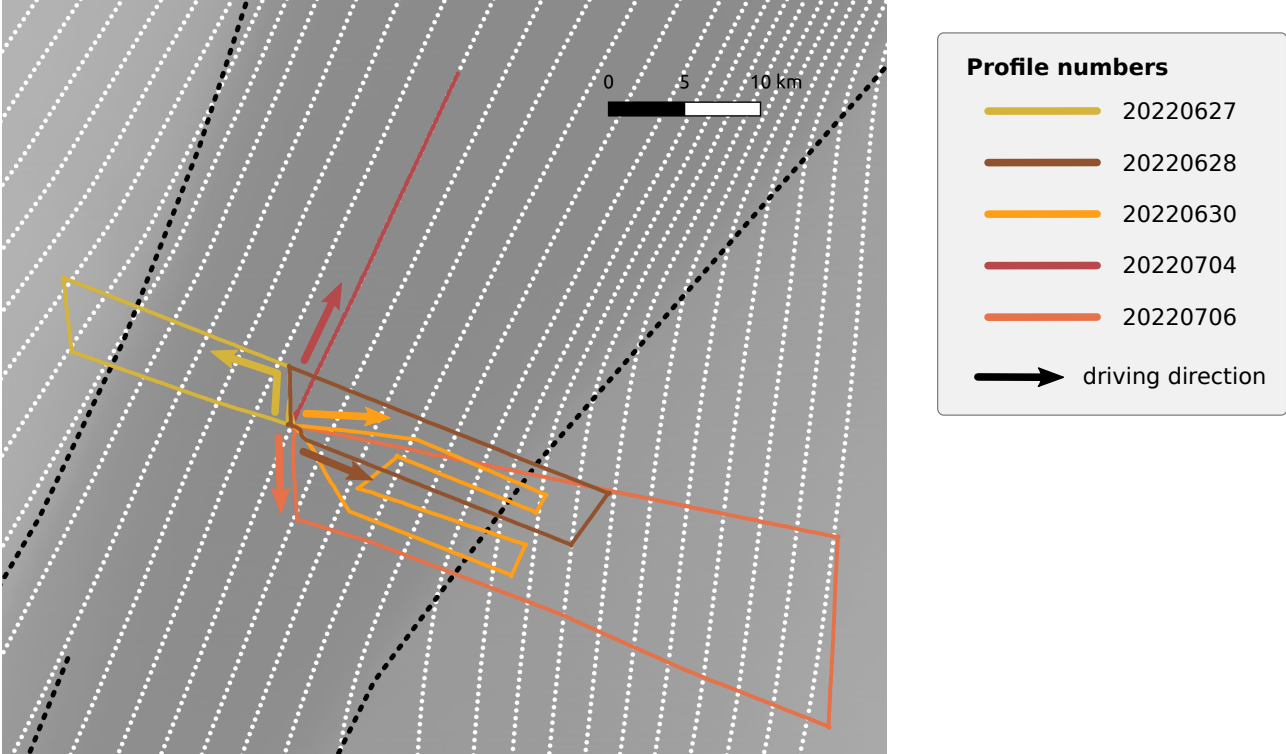

Fig. S1: Overview of profile names and driving directions. Profile '20220704' was measured double on the way back to camp upon turning at the downstream end.

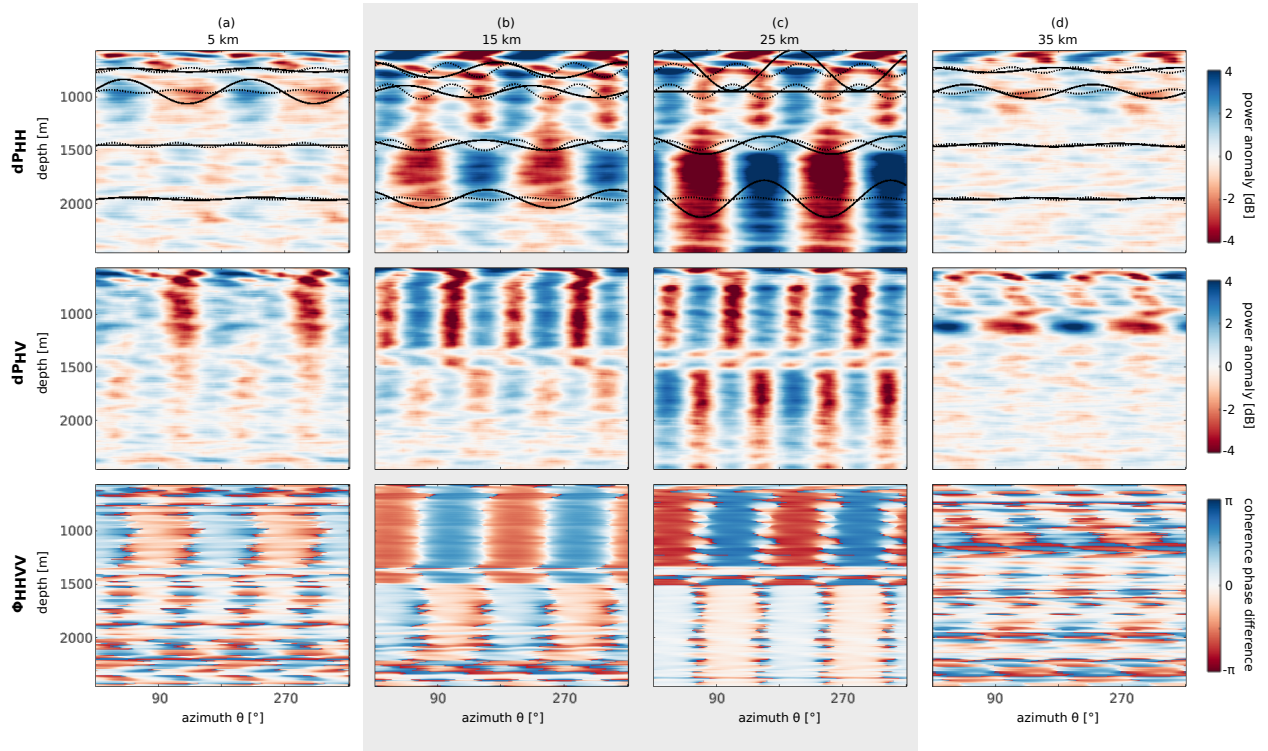

Fig. S2: Synthesized azimuthal radar response for profile '20220627': top panels show the co-polarized power anomaly  $dP_{HH}$ , middle panels show the cross-polarized power anomaly  $dP_{HV}$ , and bottom panels show the coherence phase difference  $\phi_{HHV}$ . White background indicates locations inside the ice stream and light gray is less than 3 km from the shear margin.

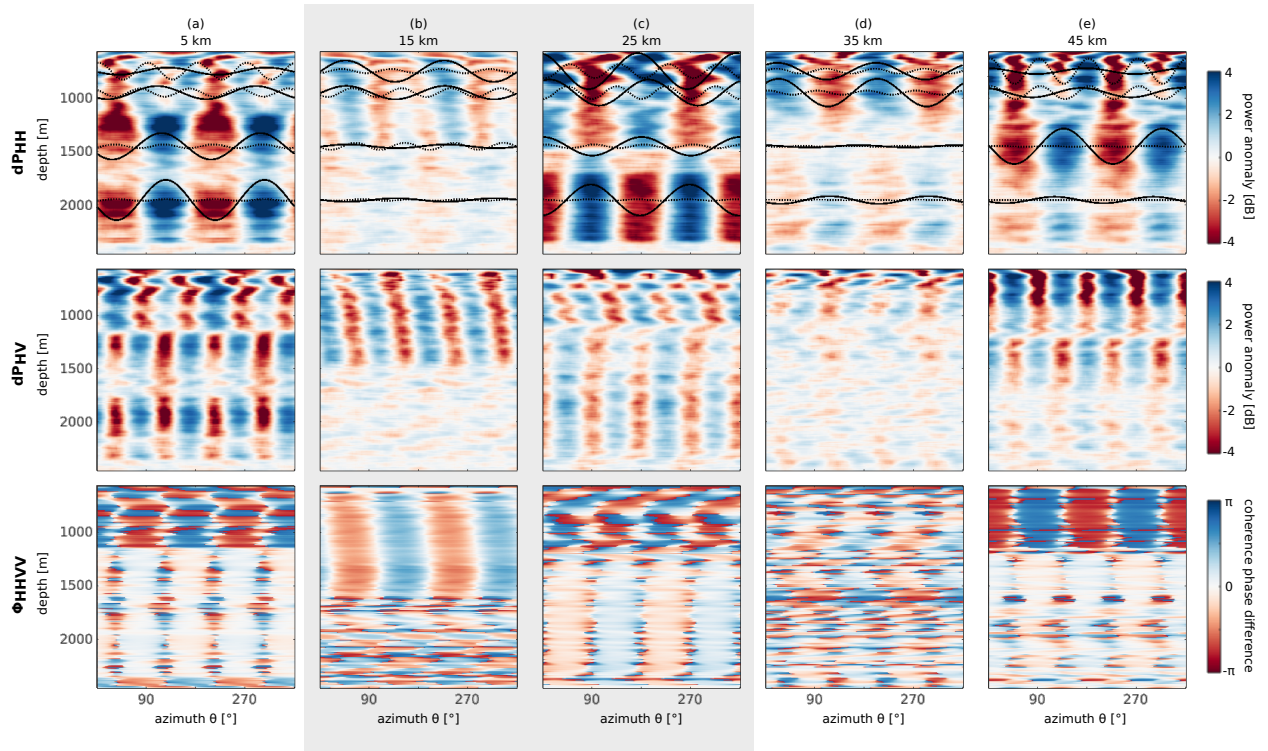

Fig. S3: Synthesized azimuthal radar response for profile '20220628': top panels show the co-polarized power anomaly  $dP_{HH}$ , middle panels show the cross-polarized power anomaly  $dP_{HV}$ , and bottom panels show the coherence phase difference  $\phi_{HHV}$ . White background indicates locations inside the ice stream and light gray is less than 3 km from the shear margin.



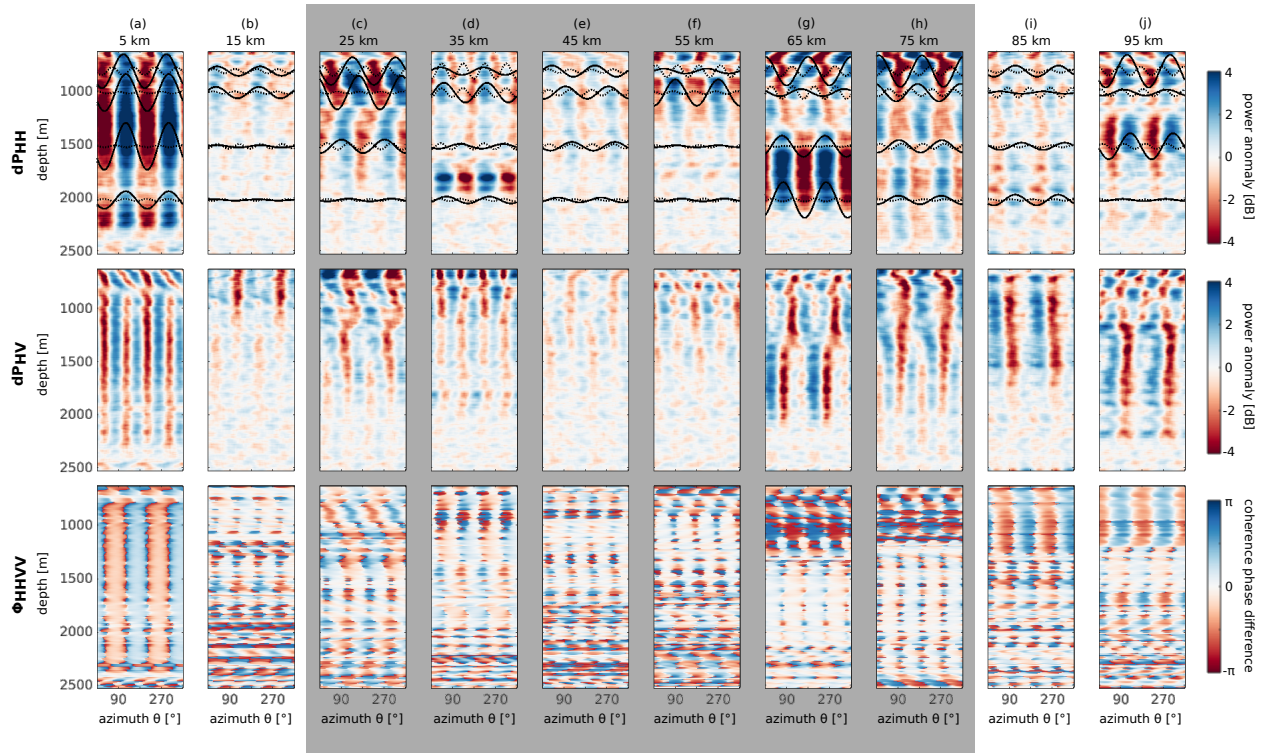

Fig. S4: Synthesized azimuthal radar response for profile '20220628': top panels show the co-polarized power anomaly  $dP_{HH}$ , middle panels show the cross-polarized power anomaly  $dP_{HV}$ , and bottom panels show the coherence phase difference  $\phi_{HHV}$ . White background indicates locations inside the ice stream and dark gray is outside the NEGIS.

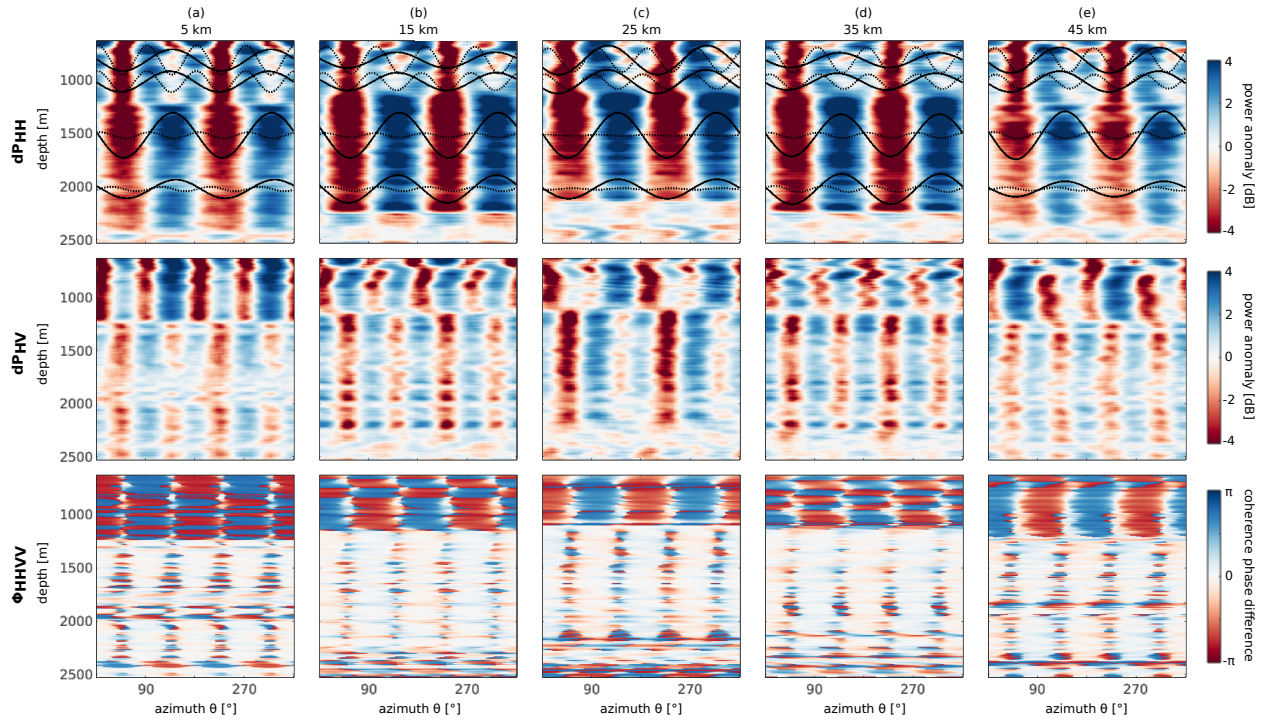

Fig. S5: Synthesized azimuthal radar response for profile '20220704': top panels show the co-polarized power anomaly  $dP_{HH}$ , middle panels show the cross-polarized power anomaly  $dP_{HV}$ , and bottom panels show the coherence phase difference  $\phi_{HHV}$ .



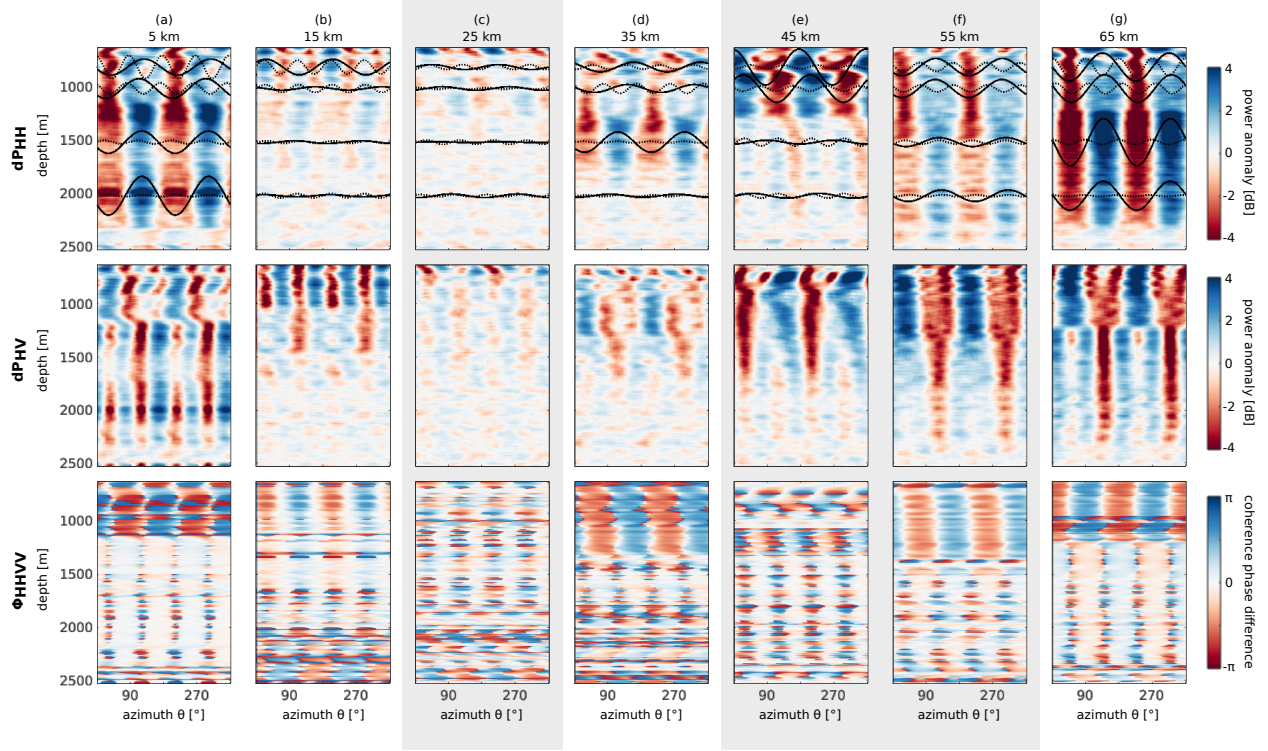

Fig. S6: Synthesized azimuthal radar response for profile '20220706': top panels show the co-polarized power anomaly  $dP_{HH}$ , middle panels show the cross-polarized power anomaly  $dP_{HV}$ , and bottom panels show the coherence phase difference  $\phi_{HHVV}$ . White background indicates locations inside the ice stream, light gray is less than 3 km from a shear margin.

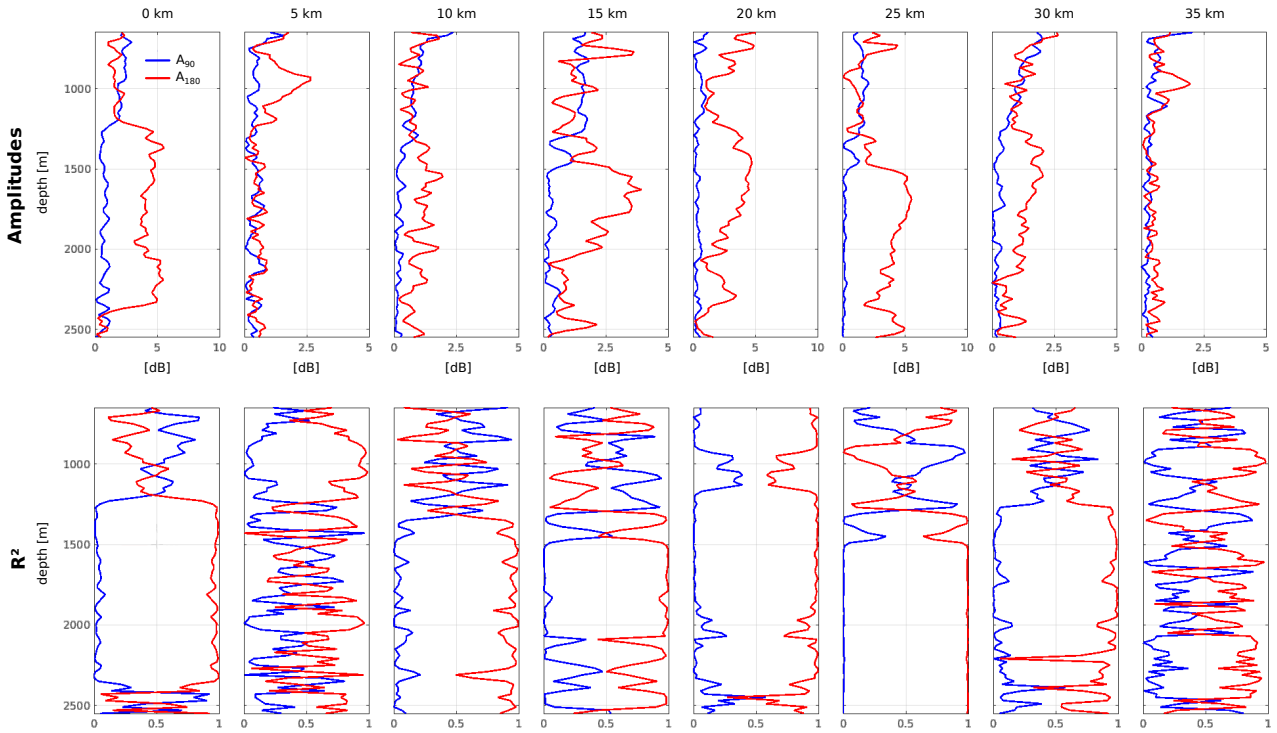

Fig. S7: Amplitudes and goodness of fit for  $90^\circ$ - and  $180^\circ$ -periodic sine curve in profile '20220627'. Top panels show the amplitudes of birefringence (blue) and scattering (red) in dB at 5 km intervals along the profile, with start and driving direction indicated in Fig. S1. Bottom panels show the coefficient of determination ( $R^2$ ), indicating the goodness of the fit, ranging from 0 to 1, for both curves.

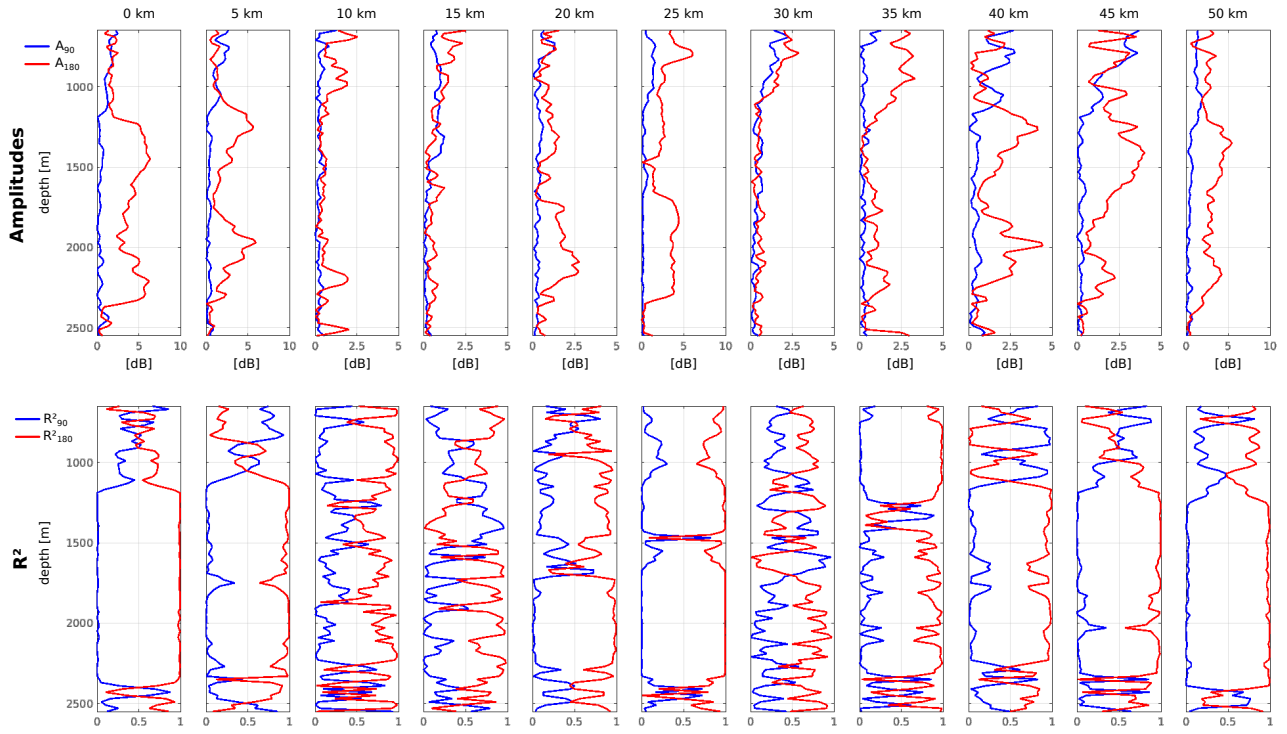

Fig. S8: Amplitudes and goodness of fit for 90°- and 180°-periodic sine curve in profile '20220628'. Top panels show the amplitudes of birefringence (blue) and scattering (red) in dB at 5 km intervals along the profile, with start and driving direction indicated in Fig. S1. Bottom panels show the coefficient of determination ( $R^2$ ), indicating the goodness of the fit, ranging from 0 to 1, for both curves.

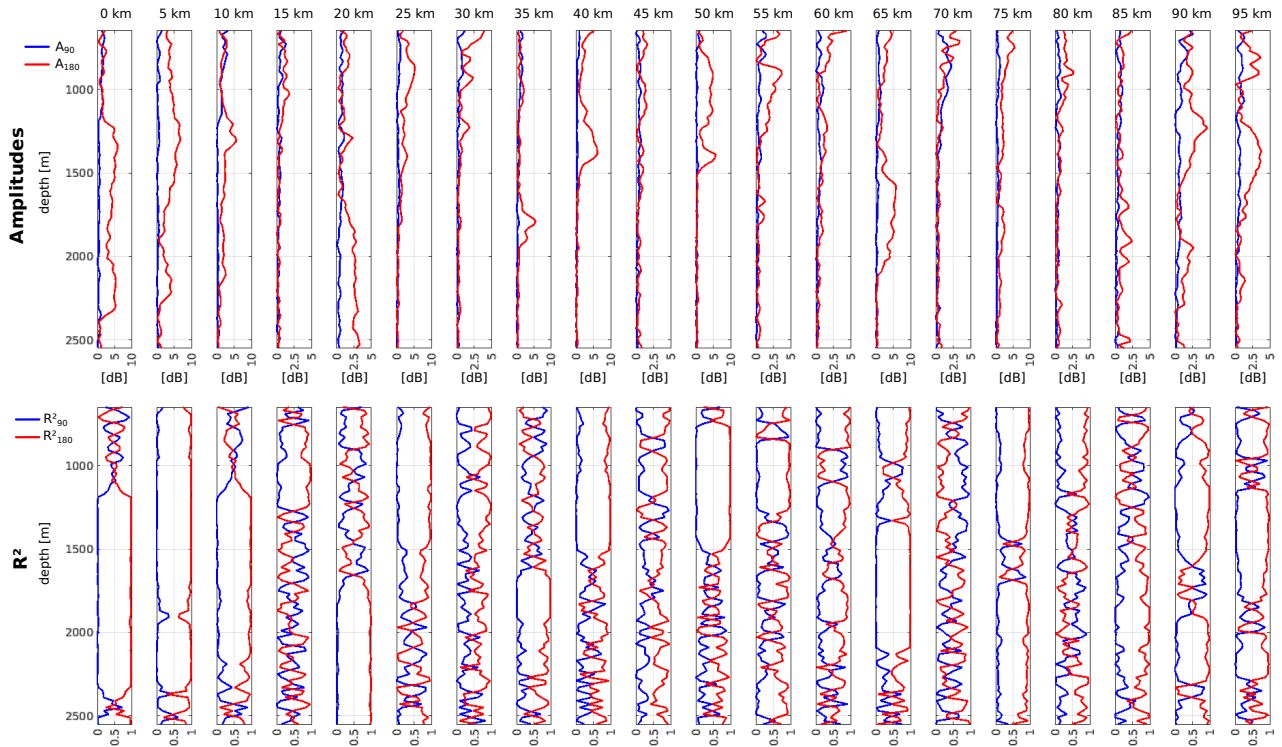

Fig. S9: Amplitudes and goodness of fit for 90°- and 180°-periodic sine curve in profile '20220630'. Top panels show the amplitudes of birefringence (blue) and scattering (red) in dB at 5 km intervals along the profile, with start and driving direction indicated in Fig. S1. Bottom panels show the coefficient of determination ( $R^2$ ), indicating the goodness of the fit, ranging from 0 to 1, for both curves.

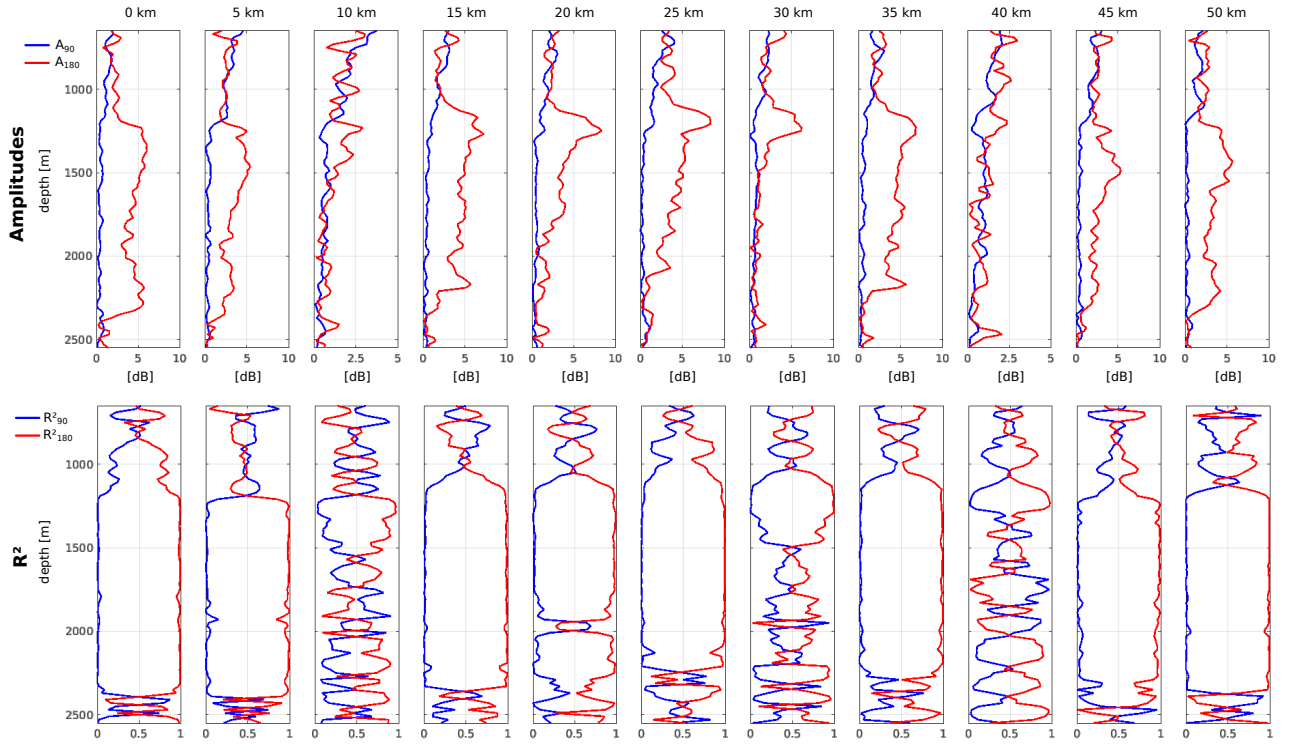

Fig. S10: Amplitudes and goodness of fit for 90°- and 180°-periodic sine curve in profile '20220704'. Top panels show the amplitudes of birefringence (blue) and scattering (red) in dB at 5 km intervals along the profile, with start and driving direction indicated in Fig. S1. Bottom panels show the coefficient of determination ( $R^2$ ), indicating the goodness of the fit, ranging from 0 to 1, for both curves.

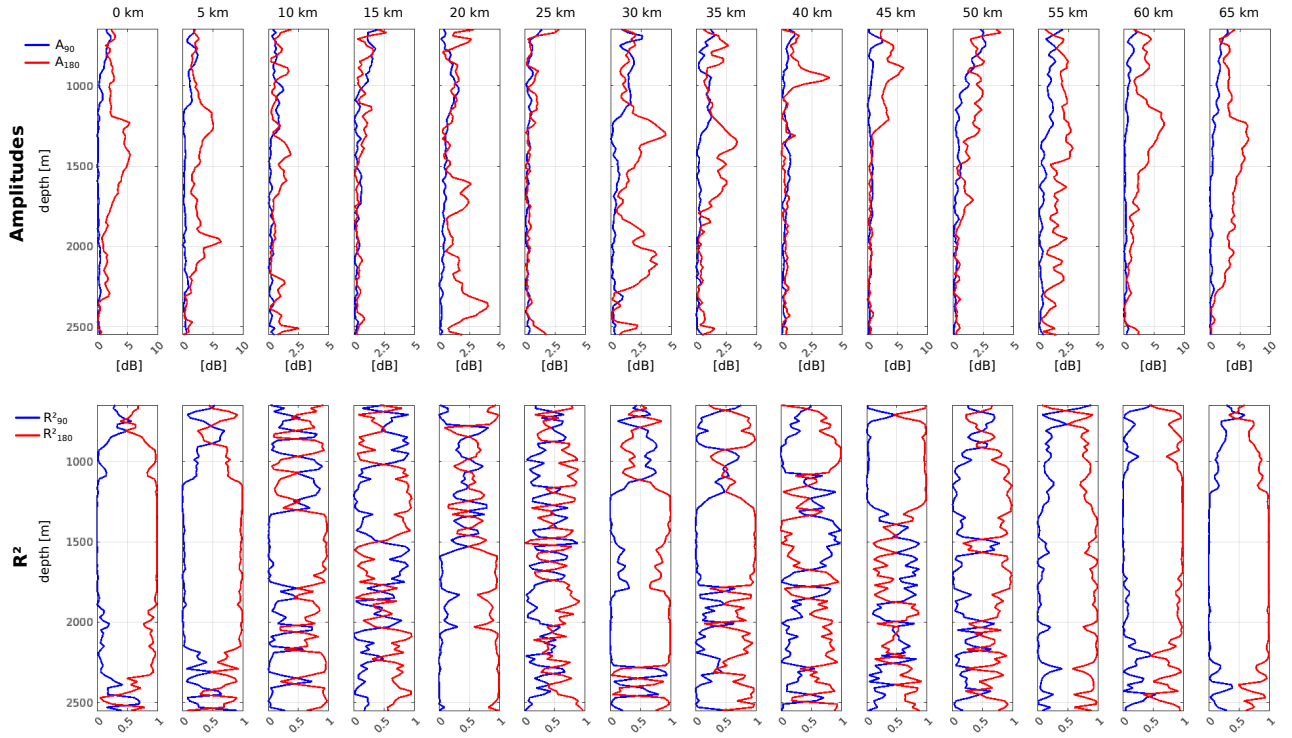

Fig. S11: Amplitudes and goodness of fit for 90°- and 180°-periodic sine curve in profile '20220628'. Top panels show the amplitudes of birefringence (blue) and scattering (red) in dB at 5 km intervals along the profile, with start and driving direction indicated in Fig. S1. Bottom panels show the coefficient of determination ( $R^2$ ), indicating the goodness of the fit, ranging from 0 to 1, for both curves.



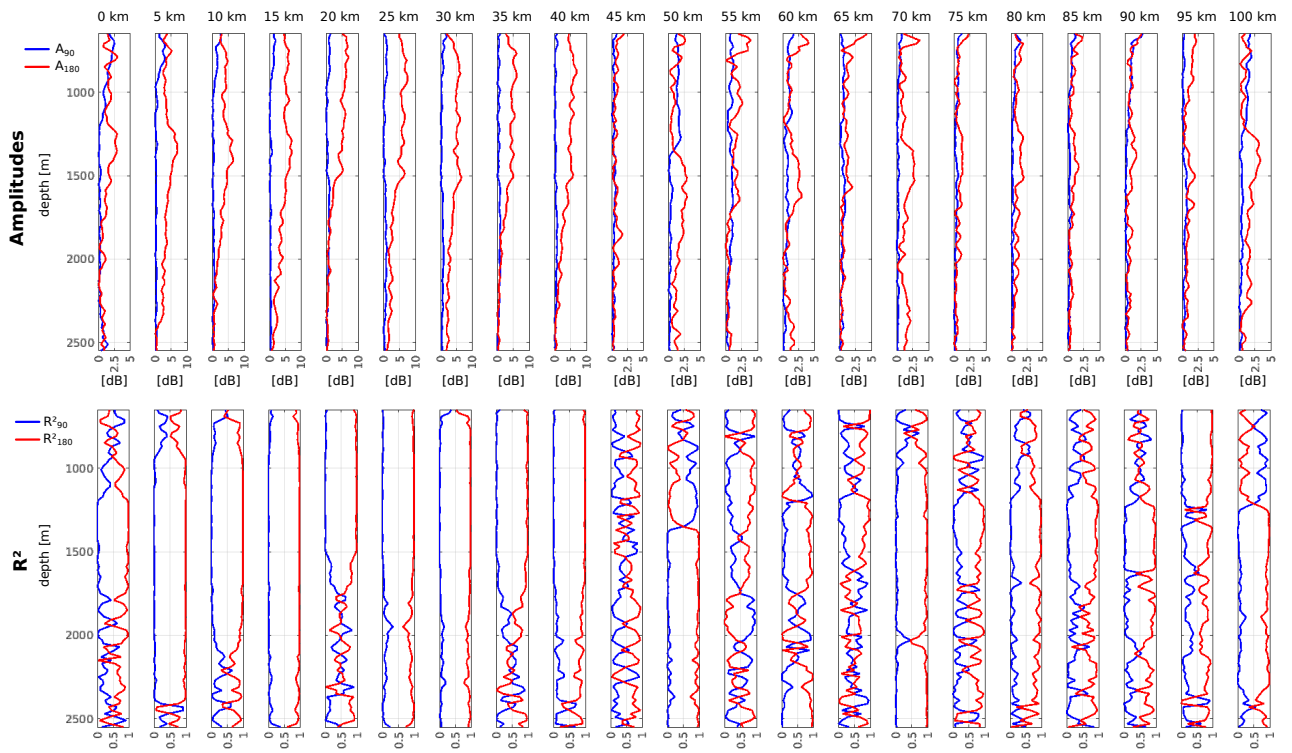

Fig. S12: Amplitudes and goodness of fit for 90°- and 180°-periodic sine curve in profile A (see Fig. 1). Top panels show the amplitudes of birefringence (blue) and scattering (red) in dB at 5 km intervals along the profile, with start and driving direction indicated in Fig. S1. Bottom panels show the coefficient of determination ( $R^2$ ), indicating the goodness of the fit, ranging from 0 to 1, for both curves.

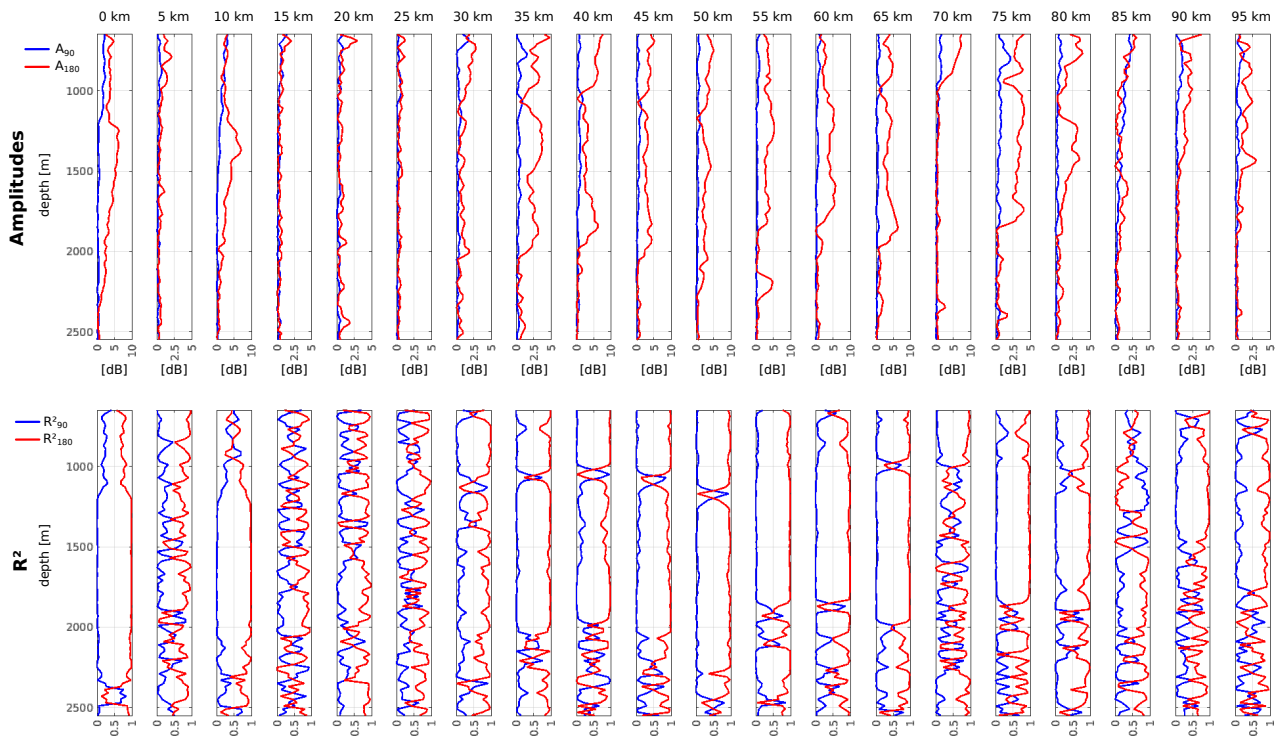

Fig. S13: Amplitudes and goodness of fit for 90°- and 180°-periodic sine curve in profile B (see Fig. 1). Top panels show the amplitudes of birefringence (blue) and scattering (red) in dB at 5 km intervals along the profile, with start and driving direction indicated in Fig. S1. Bottom panels show the coefficient of determination ( $R^2$ ), indicating the goodness of the fit, ranging from 0 to 1, for both curves.
